# Supplementary material for: Association between sacubitril/valsartan initiation and real‐world health status trajectories over 18 months in heart failure with reduced ejection fraction
Source: PubMed Central journal article supplement — ESC Heart Fail. 2021 May 1;8(4):2670–8. doi: 10.1002/ehf2.13298 (PMC8318450; doi:10.1002/ehf2.13298), 2021-05-01
Supplement: EHF2-8-2670-s001.pdf [file EHF2-8-2670-s001.pdf]

**Supplemental Figure 1: Rate of patient initiation on ARNI**

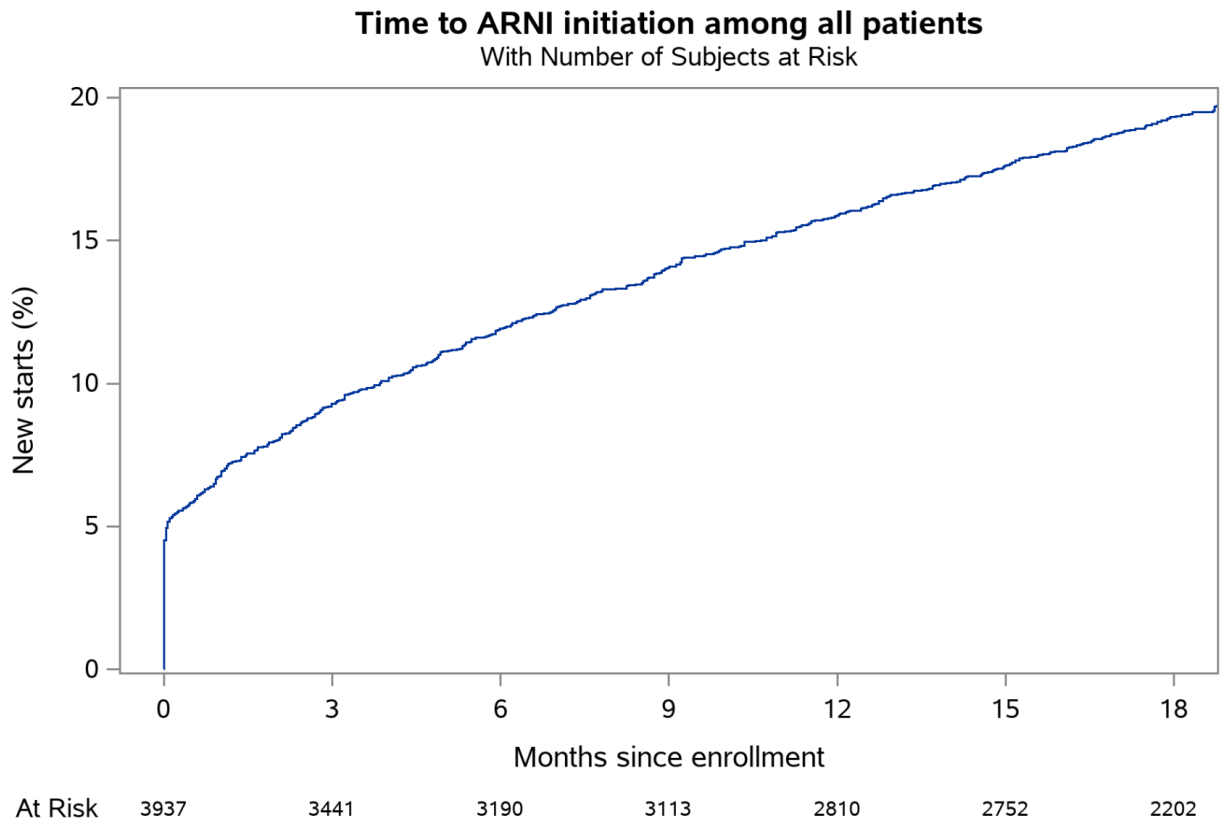

**Supplemental Figure 2:** Rate of patient discontinuation of ARNI

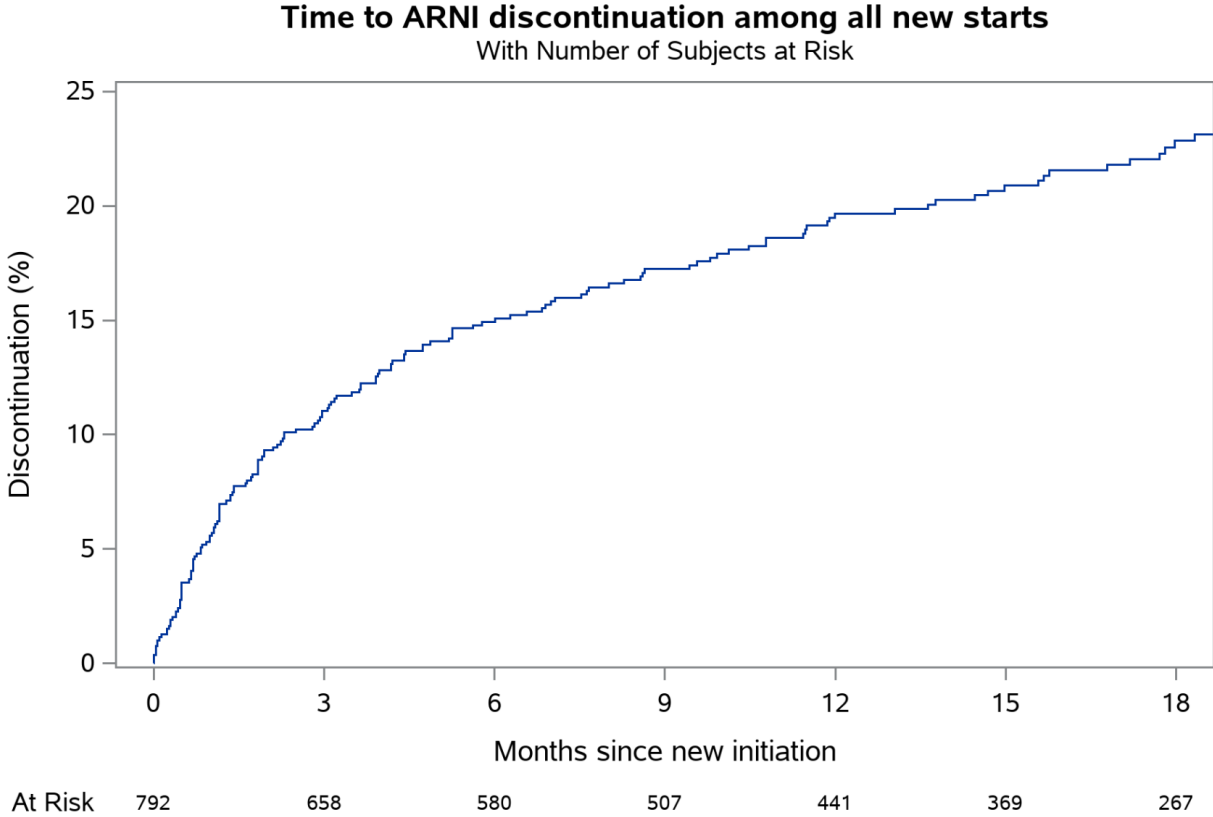

**Supplemental Figure 3: KCCQ Overall Summary Score Health Status Trajectory in Patients Initiated on ARNI vs Not Through 18-months Following Initiation**

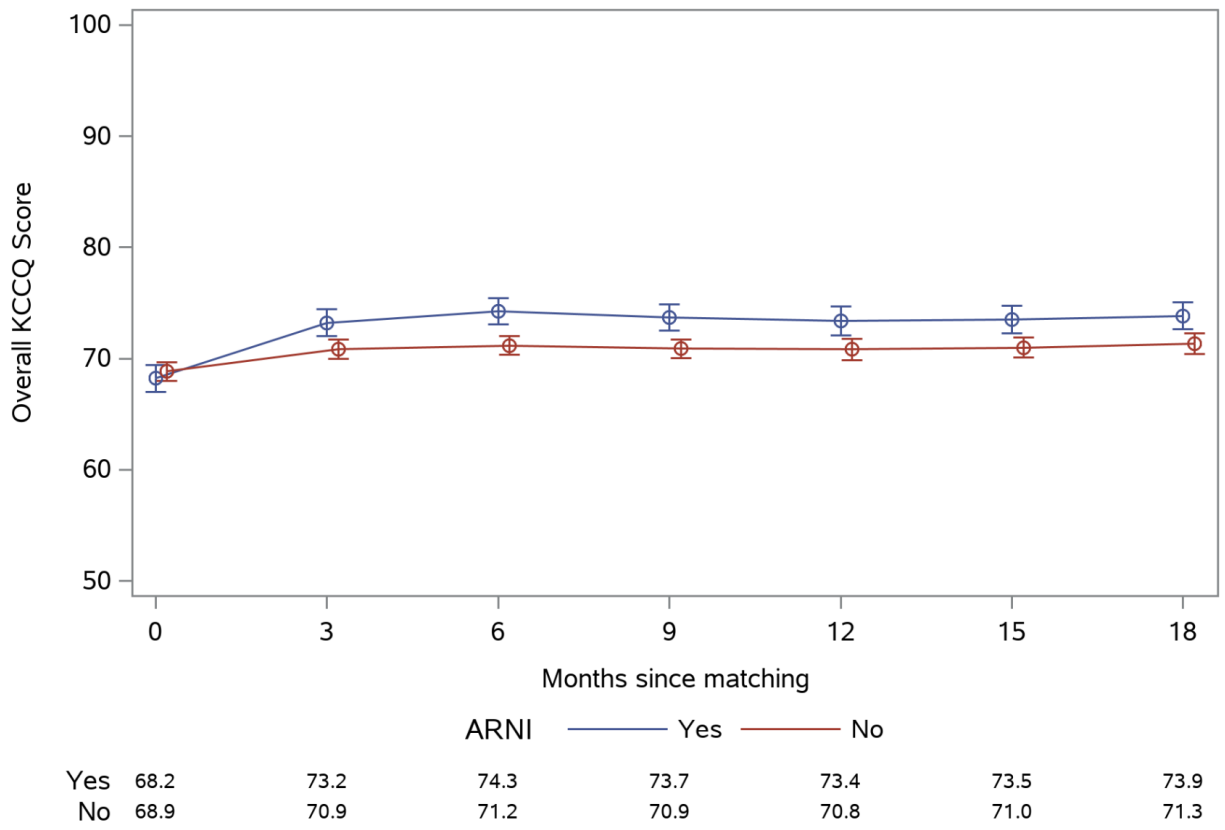

**Supplemental Figure 4: KCCQ Domain Health Status Trajectories in Patients Initiated on ARNI vs Not Through 18-months Following Initiation**

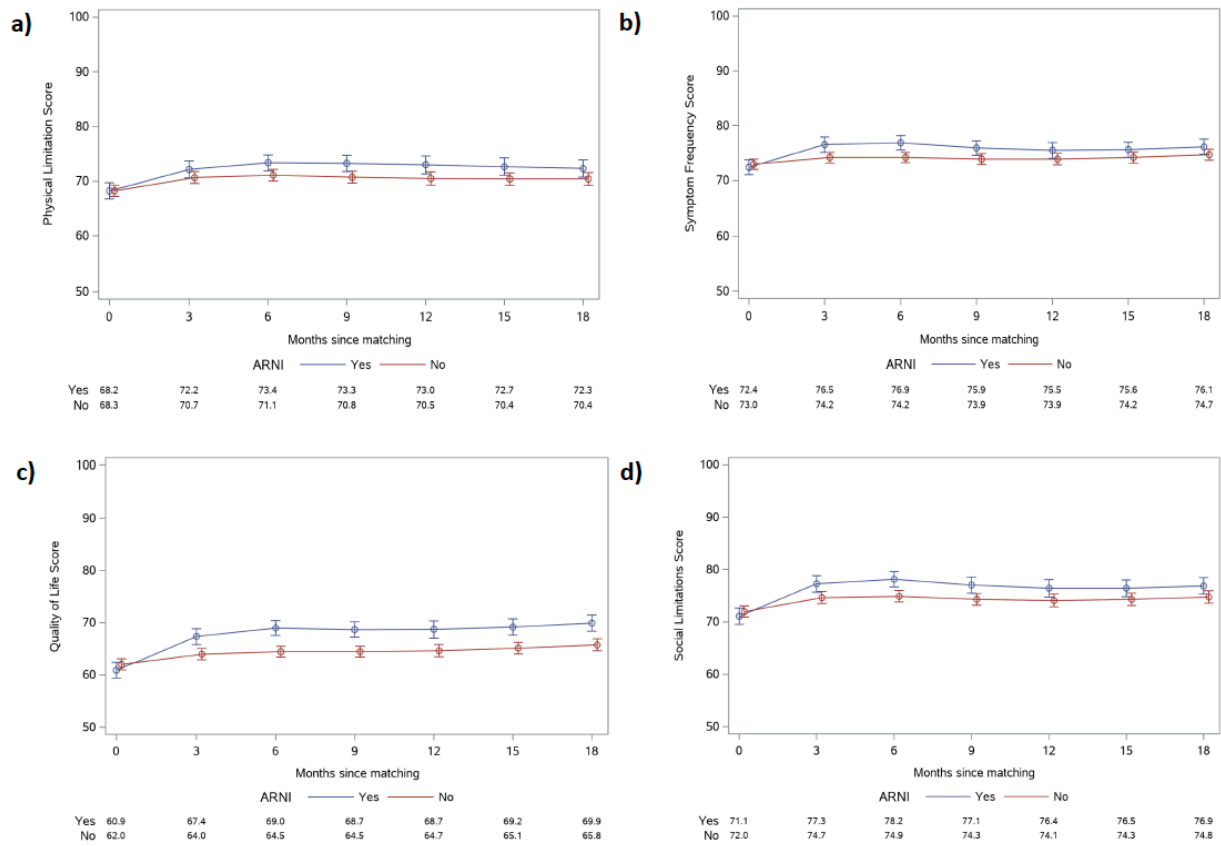

a) Physical Limitation Score (p=0.16), b) Symptom Frequency Score (p=0.02), c) Quality of Life Score (p<0.001), d) Social Limitations Score (p=0.007)
